# Supplementary material for: Cellular migration into a subretinal honeycomb-shaped prosthesis for high-resolution prosthetic vision
Source: PubMed Central journal article supplement — Proc Natl Acad Sci U S A. 2023 Oct 13;120(42):e2307380120. doi: 10.1073/pnas.2307380120 (PMC10589669; doi:10.1073/pnas.2307380120), 2023-10-13
Supplement: pnas.2307380120.sapp.pdf [file pnas.2307380120.sapp.pdf]

Supplementary information

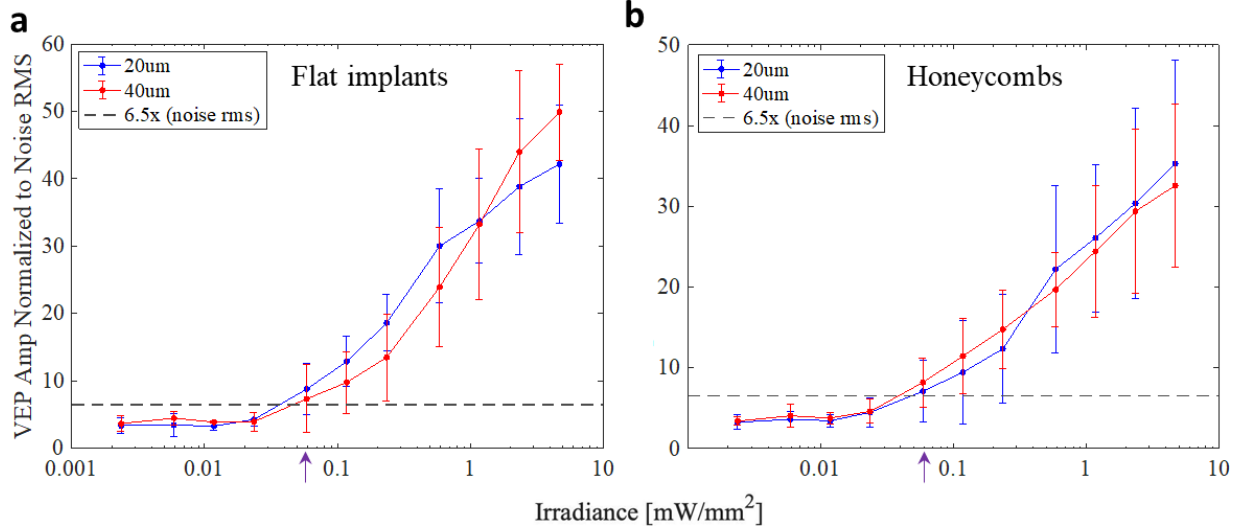

**S1.** (a) The normalized VEP amplitude as a function of stimulus irradiance for the planar photovoltaic devices with 20 and 40  $\mu\text{m}$  pixels. The black dashed line indicates the average noise level. The average threshold is  $0.057 \pm 0.029 \text{ mW}/\text{mm}^2$  (b) The normalized VEP amplitude as a function of stimulus irradiance for 3D devices with polymer walls. The stimulation threshold is  $0.064 \pm 0.034 \text{ mW}/\text{mm}^2$ , similar to flat implants (arrows).

S2

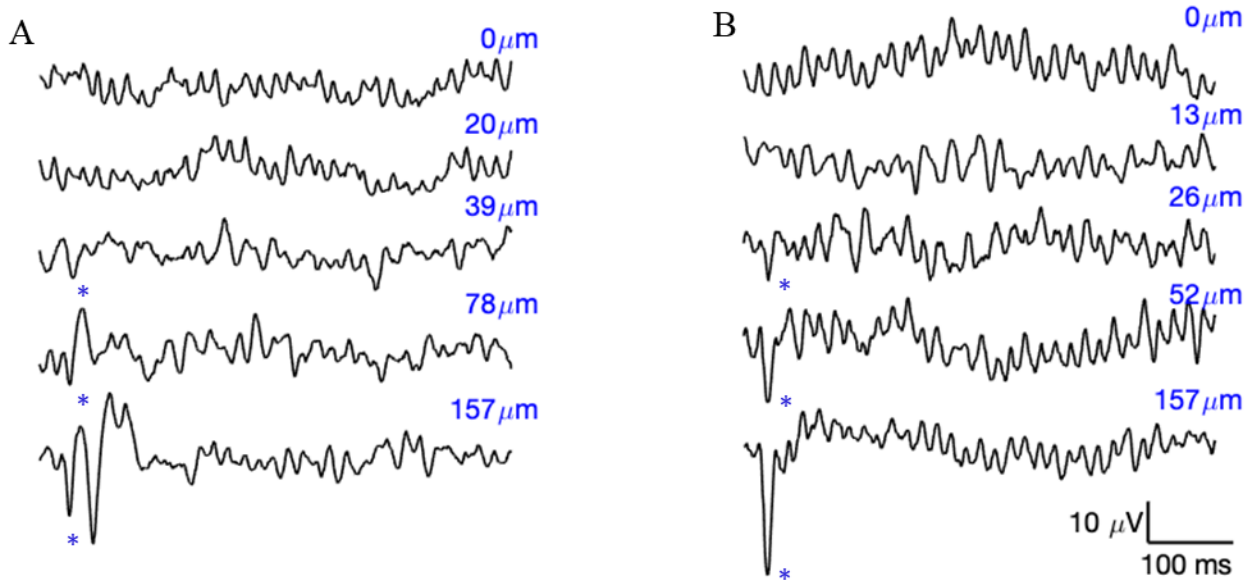

**S2.** Example VEP traces in response to alternating grating of various stripe widths, in rats with (a) 40 μm and (b) 20 μm honeycombs.

Cellular migration into a subretinal honeycomb-shaped prosthesis for high-resolution prosthetic vision

| <b>Primary antibodies</b>             |                                             |                                  |
|---------------------------------------|---------------------------------------------|----------------------------------|
| <b>Cell type</b>                      | <b>Host/Antibody</b>                        | <b>Supplier/Catalogue number</b> |
| Rod bipolar                           | Mouse/PKC $\alpha$                          | SCBT/sc-8393                     |
| Cone bipolar                          | Rabbit/Secretagoin                          | Cellsignaling/ 14037             |
| Horizontal cell                       | Mouse/Calbindin                             | Swant/ CB300                     |
| Amacrine subset                       | Sheep/Choline acetyltransferase (CHAT)      | Millipore/ AB1582                |
| Blood vessels                         | Rabbit/Collagen IV (Col IV)                 | Abcam/ ab6586                    |
| Muller cells                          | Mouse/Glutamine synthase (GS)               | Novus/NBP2-43646                 |
| Muller cell nuclei                    | Rabbit/Sox 9                                | Abcam/ ab185966                  |
| Muller cell activation and astrocytes | Goat/Glial Fibrillary Acidic Protein (GFAP) | SCBT/SC-6170                     |
| Microglia                             | Rabbit/IBA 1                                | WAKO/ 019-19741                  |
| <b>Secondary antibodies</b>           |                                             |                                  |
| <b>Host/Reactivity</b>                | <b>Fluorophore</b>                          | <b>Supplier/Catalogue number</b> |
| Donkey/Rabbit                         | AF488                                       | Thermofisher/ A-21206            |
| Donkey/Mouse                          | CY3                                         | Jackson lab/ 715-165-150         |
| Donkey/Goat                           | AF594                                       | Thermofisher/ A-11058            |
| Donkey/Sheep                          | AF647                                       | Thermofisher/ A-21448            |

**Supplementary Table 1.** Primary and secondary antibodies used for immunohistochemistry
